# Supplementary material for: Is the priority review voucher program stimulating new drug development for tropical diseases?
Source: PubMed Central journal article supplement (PMC6103519; doi:10.1371/journal.pntd.0006695), 2018-08-09
Supplement: pntd.0006695.s001.pdf [file pntd.0006695.s001.pdf]

S1 Appendix

S1 Table 1: Tropical Diseases – Incidence, Transmission, Treatment and Prevention<sup>i</sup>

| <b>Disease</b>                                    | <b>Estimated Incidence (year)</b>     | <b>Transmission</b>                                         | <b>Pharmaceutical Treatment Available</b> | <b>Vaccine Available</b> | <b>Non-medical Prevention and Treatment</b>                                    |
|---------------------------------------------------|---------------------------------------|-------------------------------------------------------------|-------------------------------------------|--------------------------|--------------------------------------------------------------------------------|
| African Trypanosomiasis                           | 20,000 (2015)                         | Tsetse fly; contaminated body fluid                         | Yes                                       | No                       | Vector control                                                                 |
| Blinding Trachoma (Conjunctivitis)                | 85 Million (2016)                     | Contaminated body fluids; flies <sup>ii</sup>               | Yes                                       | No                       | Improved sanitation and hygiene; screening                                     |
| Buruli Ulcer                                      | 2,037 (2015)                          | Unknown                                                     | Yes                                       | No                       | Unknown                                                                        |
| Chagas (American Trypanosomiasis)                 | 6-7 Million (2016)                    | Triatomine bugs; contaminated body fluid; contaminated food | Yes                                       | No                       | Vector control; improved hygiene, food preparation, and education              |
| Cholera                                           | 1.3-4 Million (2015)                  | Contaminated water or food                                  | Yes                                       | Yes                      | Improved sanitation and food preparation                                       |
| Dengue                                            | 284-528 Million (2013) <sup>iii</sup> | Aedes type mosquito; contaminated blood and organs          | No                                        | Yes                      | Vector control                                                                 |
| Dracunculiasis (Guinea Worm Disease)              | 25 (2016)                             | Water fleas                                                 | No                                        | No                       | Worm extraction; improved drinking water, education, and awareness             |
| Ebola                                             | 28,616 (2014-2016)                    | Contaminated body fluids                                    | No                                        | No                       | Safe handling of infected animals and humans; surveillance and contact tracing |
| Fascioliasis (foodborne trematodiasis)            | 2 Million (2013) <sup>iv</sup>        | Contaminated fish, crustaceans or vegetables                | Yes                                       | No                       | Improved hygiene, food preparation, and sanitation                             |
| Filariasis (Lymphatic Filariasis – Elephantiasis) | 120 Million (2000)                    | Mosquitoes                                                  | Yes                                       | No                       | Vector control; keep wound clean and move around if infected                   |

| <b>Disease</b>                   | <b>Estimated Incidence (year)</b>       | <b>Transmission</b>                             | <b>Pharmaceutical Treatment Available</b> | <b>Vaccine Available</b> | <b>Non-medical Prevention and Treatment</b>                            |
|----------------------------------|-----------------------------------------|-------------------------------------------------|-------------------------------------------|--------------------------|------------------------------------------------------------------------|
| Leishmaniasis                    | 700,000-1 Million (2016)                | Female phlebotomine sandflies                   | Yes <sup>e</sup>                          | No                       | Vector control; disease surveillance                                   |
| Leprosy (Hansen's Disease)       | 211,973 (2015)                          | Contaminated body fluid; armadillos             | Yes                                       | No                       | Avoid contact with rashes and bodily fluids of infected people         |
| Malaria                          | 212 Million (2015)                      | Female Anopheles mosquitoes                     | Yes                                       | Yes                      | Vector control                                                         |
| Marburg                          | 2 (2008)                                | Rousettus bat colonies; contaminated body fluid | No                                        | No                       | Avoid contact with infected humans and animals; prompt and safe burial |
| Onchocerciasis (River Blindness) | 18 Million (2016)                       | Blackflies                                      | Yes                                       | No                       | Vector control and avoidance                                           |
| Schistosomiasis (bilharzia)      | 66.5 Million (2015)                     | Contaminated water                              | Yes                                       | No                       | Vector control; improved hygiene and sanitation; safer water           |
| Soil Transmitted Helminthiasis   | 1.5 Million (2016)                      | Contaminated vegetables, water, or soil         | Yes                                       | No                       | Improved hygiene, sanitation, and health education                     |
| Tuberculosis (TB)                | 10.4 Million (2015)                     | Contaminated body fluid                         | Yes                                       | Yes                      | Health education                                                       |
| Yaws                             | 46,000 (2015)                           | Contact with infected wound                     | Yes                                       | No                       | Health education; improved personal hygiene                            |
| Zika                             | 440,000-1.3 Million (2015) <sup>v</sup> | Aedes mosquitoes; sexual transmission           | No                                        | No                       | Vector control; rest, hydration, and pain treatment if infected        |

<sup>1</sup> Source: <http://www.who.int>, unless otherwise noted

<sup>2</sup> Source: <http://emedicine.medscape.com>

<sup>3</sup> Bhatt, S. et. al, "The Global Distribution and Burden of Dengue," Nature, 2013 April 25; 496(7446):504-7.

---

<sup>4</sup> Source: <http://www.cdc.gov>

<sup>5</sup> Only Brazil; Source: European Centre for Disease Prevention and Control, Stockholm. Zika virus disease epidemic: potential association with microcephaly and Guillain-Barré syndrome (first update). Available at <http://ecdc.europa.eu/en/publications/Publications/rapid-risk-assessment-zika-virus-first-update-jan-2016.pdf>, January 21, 2016
